1 **Title: Temperate grass allergy season defined by spatio-temporal shifts in airborne**  
2 **pollen communities**

3 **Authors:** Georgina L. Brennan<sup>1\*</sup>, Caitlin Potter<sup>2</sup>, Natasha de Vere<sup>2,3</sup>, Gareth W. Griffith<sup>2</sup>,  
4 Carsten A. Skjøth<sup>4</sup>, Nicholas J. Osborne<sup>5,6</sup>, Benedict W. Wheeler<sup>5</sup>, Rachel N. McInnes<sup>7</sup>,  
5 Yolanda Clewlow<sup>7</sup>, Adam Barber<sup>7</sup>, Helen M. Hanlon<sup>7</sup>, Matthew Hegarty<sup>2</sup>, Laura  
6 Jones<sup>1,3</sup>, Alexander Kurganskiy<sup>4</sup>, Francis M. Rowney<sup>5</sup>, Charlotte Armitage<sup>8</sup>, Beverley Adams-  
7 Groom<sup>4</sup>, Col R. Ford<sup>3</sup>, Geoff M. Petch<sup>4</sup>, The PollerGEN Consortium, and Simon Creer<sup>1\*</sup>.

8

9 **Consortium** Angela Elliot<sup>9</sup>, Carl A. Frisk<sup>4</sup>, Roy Neilson<sup>10</sup>, Stephen Potter<sup>11</sup>, Abdullah M. Rafiq<sup>1</sup>,  
10 David, B. Roy<sup>12</sup>, Katherine Selby<sup>13</sup>, Natascha Steinberg<sup>9</sup>

11

12 **Affiliations:**

13 <sup>1</sup>Molecular Ecology and Fisheries Genetics Laboratory, School of Natural Sciences, Bangor  
14 University, Bangor, Gwynedd, Wales, UK

15 <sup>2</sup>Aberystwyth University, Aberystwyth, Ceredigion, Wales, UK

16 <sup>3</sup>National Botanic Garden of Wales, Llanarthne, Carmarthenshire, Wales, UK

17 <sup>4</sup>University of Worcester, Worcester, Worcestershire, UK

18 <sup>5</sup>University of Exeter, Truro, Cornwall, UK

19 <sup>6</sup>University of New South Wales, Sydney, New South Wales, Australia

20 <sup>7</sup>Met Office, Exeter, Devon, UK

21 <sup>8</sup>The Woodland Trust, Kempton Way, Grantham, Lincolnshire, UK.

22 <sup>9</sup>College of Life and Environmental Science, University of Exeter, Exeter, UK

23 <sup>10</sup>Ecological Sciences, The James Hutton Institute, Dundee, Scotland, UK

24 <sup>11</sup>The David Hide Asthma & Allergy Research Centre, St Mary's Hospital, Newport, Isle of

25 Wight, UK

26 <sup>12</sup>Centre for Ecology & Hydrology, Crowmarsh Gifford, Wallingford, Oxfordshire, UK.

27 <sup>13</sup>Environment Department, University of York, Heslington, York, UK

28

29 **Corresponding authors:** Simon Creer ([s.creer@bangor.ac.uk](mailto:s.creer@bangor.ac.uk)) and Georgina L. Brennan

30 ([g.l.b.doonan@gmail.com](mailto:g.l.b.doonan@gmail.com))

31

32 **Abstract**

33 Grass pollen is the world's most harmful outdoor aeroallergen and sensitivity varies between  
34 species. Different species of grass flower at different times, but it is not known how airborne  
35 communities of grass pollen change in time and space. Persistence and high mobility of grass  
36 pollen could result in increasingly diverse seasonal pollen communities. Conversely, if grass  
37 pollen does not persist for an extended time in the air, shifting pollen communities would be  
38 predicted throughout the summer months. Here, using targeted high throughput sequencing,  
39 we tracked the seasonal progression of airborne Poaceae pollen biodiversity across Britain,  
40 throughout the grass allergy season. All grass genera displayed discrete, temporally restricted  
41 peaks of pollen incidence which varied with latitude, revealing that the taxonomic composition  
42 of grass pollen exposure changes substantially across the allergy season. By developing more  
43 refined aeroallergen profiling, we predict that our findings will facilitate the exploration of links  
44 between taxon-specific exposure of harmful grass pollen and disease, with concomitant socio-  
45 economic benefits.

46

47

## 48 Introduction

49 Allergens carried in airborne pollen are associated with both asthma [1] and allergic rhinitis  
50 (hay fever), negatively affecting 400 million people worldwide [2]. Pollen from the grass  
51 family (Poaceae) constitutes the most significant outdoor aeroallergen [3, 4], and more  
52 people are sensitised to grass pollen than to any other pollen type [5]. However, despite the  
53 harmful impact of grass pollen on human health, current observational studies and forecasts  
54 categorize grass pollen at the family level [Poaceae; 6, 7] due to difficulties in differentiating  
55 species and genera of grass pollen based on morphology [8]. Furthermore, we cannot predict  
56 seasonal variation in airborne grass pollen from the phenology of local grasses at ground  
57 level, since airborne pollen can be highly mobile [9, 10] and often does not directly correlate  
58 to local flowering times [9]. Understanding the taxon-specific phenology of airborne pollen  
59 would fill a significant knowledge gap in our understanding of allergen triggers, with  
60 associated benefits to healthcare providers, pharmaceutical industries and the public.

61

62 Many species within the subfamilies Pooideae, Chloridoideae, and Panicoideae release  
63 allergenic pollen into the atmosphere [5], including *Phleum* spp. (e.g. Timothy grasses),  
64 *Dactylis* spp. (Cocksfoot grasses), *Lolium* spp. (Ryegrasses), *Trisetum* spp. (Oatgrasses),  
65 *Festuca* spp. (Fescues), *Poa* spp. (Meadow-grasses and Bluegrasses), and *Anthoxanthum* spp.  
66 (Vernal grasses). However, it is unknown whether particular grass species contribute more to  
67 the prevalence of allergic symptoms and related diseases than others [11]. Whilst some  
68 grasses have been identified as more allergenic than others *in vitro* (triggering higher levels  
69 of Immunoglobulin E (IgE) antibody production), there is a high degree of cross-reactivity  
70 between grass species [12]. In addition, the allergen profiles and the degree of sensitisation

71 differ between grass species [12, 13] and the allergenicity of grass pollen varies across  
72 seasons [14]. Family-level estimates of grass pollen concentrations cannot therefore be  
73 considered a reliable proxy for either the concentration of pollen-derived aeroallergens or  
74 pollen-induced public health outcomes.

75

76 The identification of biodiversity via the high-throughput analysis of taxonomy marker genes  
77 (popularly termed metabarcoding) provides an emerging solution to semi-quantitatively  
78 identify complex mixtures of airborne pollen grains [15-18]. Previous metabarcoding studies  
79 of airborne pollen have been performed at very limited spatial and temporal scales [e.g. 15,  
80 16]. Recent global DNA barcoding initiatives and co-ordinated regional efforts have now  
81 resulted in near complete genetic databases of national native plants, including grasses in  
82 Great Britain [19].

83

84 Here, using two complementary DNA barcode marker genes (*rbcl* and ITS2), we characterise  
85 the spatial and temporal distribution of airborne grass pollen throughout the temperate  
86 summer grass pollen season (May-August) across the latitudinal and longitudinal range of  
87 Great Britain (S1 Fig). We hypothesise that (i) there will be discrete temporal incidences of  
88 pollen from different grasses, linked to Poaceae terrestrial phenology, and (ii) the  
89 composition of grass pollen will be homogenous across the UK due to the potential for long  
90 distance transport of windborne pollen grains.

91

92 **Results and Discussion**

93 Grass pollen occupied distinct temporal windows across the grass allergy season in 2016  
94 (May to August), thereby supporting our hypothesis (i) that species composition of airborne  
95 grass pollen will change throughout the grass allergy season (Fig 1, Fig 2). Time, measured as  
96 number of days after the first sample was collected, is a good predictor of airborne grass  
97 pollen taxon composition using both markers (Fig 1-2; *ITS2*,  $LR_{1,74} = 128.8$ ,  $P = 0.001$ ; *rbcl*,  
98  $LR_{1,71} = 46.71$ ,  $P = 0.001$ ). We found that month (coded as a factor in the models) improves  
99 our ability to predict taxonomic composition across the pollen season (Fig 1-2; *ITS2*,  $LR_{1,70} =$   
100  $319.7$ ,  $P = 0.001$ ; *rbcl*,  $LR_{1,67} = 217.25$ ,  $P = 0.001$ ). In addition, community-level ordination  
101 reveals that the community as a whole changed across the allergy season (S2 Fig).

102

103 Focusing on the more taxonomically specific *ITS2* marker dataset, *Alopecurus* and *Holcus*  
104 typically dominated the early grass pollen season (Fig 1), which coincides with typical peaks in  
105 allergic rhinitis [20], but further research will be required to confirm this association. *Lolium*  
106 featured prominently for the majority of the later grass season. The popularity of *Lolium*  
107 species as forage crop means that many varieties have been bred with the potential to  
108 mature at different times throughout the year [21]. While *Lolium* was the dominant species  
109 in airborne grass pollen from July to the end of the sampling period, the total grass pollen  
110 concentration declined in August, indicating that the absolute number of *Lolium* pollen grains  
111 at this time is low (S3 Fig).

112

113 The top five genera contributing to airborne pollen, indicated by the relative abundance of  
114 taxonomy marker genes, were *Alopecurus*, *Festuca*, *Lolium*, *Holcus* and *Poa* (Fig 1; S3 Fig).  
115 Each of these genera are widespread in the UK and have been shown to provoke IgE-

116 mediated responses in grass-sensitised patients [12], providing candidate species for links  
117 with hay fever and asthma exacerbation. Conversely, less prevalent species in the dataset  
118 could contribute disproportionately to the allergenic load. Species such as *Phleum pratense*  
119 have been identified to be a major source of allergenic pollen [5, 22]. However, we found  
120 that *Phleum* made up a very small proportion of metabarcoding reads (Fig 2), corresponding  
121 with the results of an earlier phenological study [23]. Most genera, such as *Phleum*,  
122 *Anthoxanthum* and *Dactylis*, show distinct and narrow temporal incidence (Fig 2), and could  
123 allow researchers to identify grass species associated with allergenic windows with greater  
124 accuracy.

125

126 Changes in species composition over time were localised. We found that peaks in abundance  
127 of airborne pollen occurred at different times at each location during the summer (Fig 1-2).  
128 For example, the relative abundance of airborne grass pollen from the genus *Poa* peaked in  
129 mid-June in Worcester and Bangor but 6-8 weeks later in Invergowrie (Fig 1), probably due to  
130 latitudinal effects on flowering time [7, 24]. This is supported by a significant interaction  
131 between latitude and time of year for both markers (Fig 1-2; *ITS2*,  $LR_{68,1} = 46.4$ ,  $P = 0.001$ ;  
132 *rbcL*,  $LR_{66,1} = 59.08$ ,  $P = 0.001$ ), and between longitude and time of year for the *ITS2* dataset  
133 (Fig 1-2;  $LR_{67,1} = 37.5$ ,  $P = 0.001$ ). Differences in species composition of airborne grass pollen  
134 between the six sampling sites is supported by a significant effect of latitude (Fig 1-2; *ITS2*,  
135  $LR_{1,73} = 73.2$ ,  $P = 0.001$ ; *rbcL*,  $LR_{1,70} = 26.4$ ,  $P = 0.025$ ) and longitude (Fig 1-2; *ITS2*,  $LR_{1,69} =$   
136  $36.5$ ,  $P = 0.005$ ; *rbcL*,  $LR_{1,69} = 27.10$ ,  $P = 0.018$ ). These results do not support our hypothesis  
137 (ii) that the composition of grass pollen will be homogenous across the UK, and instead

138 suggest taxon-specific effects of regional geography and climate which have been  
139 demonstrated for Poaceae pollen as a whole [7].  
140  
141 Observations of first flowering dates from a citizen science project (UKPN;  
142 [www.naturescalendar.org.uk](http://www.naturescalendar.org.uk)) and metabarcoding data show similar sequences of seasonal  
143 progression (Fig 3). First flowering dates of each genus started almost 3-4 weeks prior to the  
144 observation of peaks of grass pollen in the metabarcoding data (Fig 3). Pollen release  
145 (anthesis) occurs approximately 2-3 weeks after the production of flowering heads (heading)  
146 [25], and this is reflected in the metabarcoding data suggesting that local flowering data are  
147 informative for predicting the composition of airborne pollen. Continuing this study over  
148 multiple years would allow us to track long-term, phenological changes in airborne pollen  
149 communities and improve our ability to forecast the seasonal progression of airborne pollen  
150 [26].

151  
152 Enabled by contemporary molecular biodiversity analytical approaches and mature, curated  
153 DNA barcoding databases, here we provide a comprehensive taxonomic overview of airborne  
154 grass pollen distribution, throughout an entire allergy season and across large geographic  
155 scales. The grass pollen season is defined by discrete temporal windows of different grass  
156 species, with some grass species displaying geographical variation. Temporal pollen  
157 distributions in metabarcoding data follow observed flowering times. The data provide an  
158 important step towards developing species-level grass pollen forecasting. Additionally, the  
159 research presented here leads the way for future studies facilitating understanding of the  
160 relationships between grass pollen and disease, which have significant global public health  
161 relevance and socioeconomic importance.



162

## 163 **Methods**

### 164 **Sampling and Experimental Design**

165 We collected aerial samples from six sites across the UK (S3 Table; S1 Fig) using Burkard  
166 Automatic Multi-Vial Cyclone Samplers (Burkard Manufacturing Co. Ltd. Rickmansworth, UK).  
167 The volumetric aerial sampler uses a turbine to draw in air (16.5 litres/min) and aerial  
168 particles are collected, using mini-cyclone technology into 1.5 ml sterile microcentrifuge  
169 tubes located on a carousel (S5 Fig). Each sampling unit was mounted alongside a seven-day  
170 volumetric trap (Burkard Manufacturing Co. Ltd. Rickmansworth, UK) belonging to the Met  
171 Office UK Pollen Monitoring Network, which provided daily pollen count data. In the seven-  
172 day volumetric trap, aerial particles are collected onto an adhesive coated tape supported on  
173 a clockwork-driven drum. The tape is cut into 24 h sections and pollen are identified and  
174 counted under a microscope [7]. Bangor was the only sampling site which was not part of the  
175 pollen monitoring network, but we deployed the same methodology at the Bangor site.

176

177 Sampling began in late May 2016 (S4 Table) and during alternate weeks, aerial samples were  
178 collected for seven days for a total of seven weeks between 25<sup>th</sup> May and 28<sup>th</sup> August. Exact  
179 sampling dates varied slightly between sites (S4 Table) and a total of 279 aerial samples were  
180 collected.

181

### 182 **DNA Extraction, PCR and Sequencing**

183 From the 279 daily aerial samples, 231 were selected for downstream molecular analysis, as  
184 described below. Within each sampling week, two series of three consecutive days were  
185 pooled. Pooled samples were selected based on grass pollen counts obtained by microscopy.

186 The final, unselected, day was not used in downstream molecular analysis. In total, seventy-  
187 seven pools of DNA were created. In one instance, three consecutive days of pollen samples  
188 were unavailable (Invergowrie, week 2, pool 2) due to trap errors. For this sample, the next  
189 sampling day was selected for pooling (S4 Table). DNA was extracted from daily samples  
190 using a DNeasy Plant Mini kits (Qiagen, Valencia, CA, USA), with some modifications to the  
191 standard protocol as described by [27]. DNA from daily samples was pooled and eluted into  
192 60  $\mu$ l of elution buffer at the binding stage of the DNeasy Plant Mini kit.

193

194 Illumina MiSeq paired end indexed amplicon libraries were prepared following a two-step  
195 protocol as recommended by the manufacturer [28]. Two marker genes were amplified with  
196 universal primer pairs *rbcLaf* and *rbcLr506* [19, 29], and ITS2 and ITS3 [14] (S6 Table). A 5'  
197 universal tail was added to the forward and reverse primers and a 6N sequence was added  
198 between the forward universal tail and the template-specific primer, which is known to  
199 improve clustering and cluster detection on MiSeq sequencing platforms [30] (Integrated  
200 DNA Technologies, Coralville, USA). Round 1 PCR was carried out in a final volume of 25  $\mu$ L,  
201 including forward and reverse primers (0.2  $\mu$ M), 1X Q5 HS High-Fidelity Master Mix (New  
202 England Biolabs) and 1  $\mu$ L of template DNA. Thermal cycling conditions were an initial  
203 denaturation step at 98 °C for 30s; 35 cycles of 98 °C for 10s, 50 °C for 30s, 72 °C for 30s; and  
204 a final annealing step of 72 °C for 5 minutes. Products from the first PCR were purified using  
205 Agencourt AMPure XP beads (Beckman Coulter) with a 1:0.6 ratio of product to AMPure XP  
206 beads.

207

208 The second round PCR added the unique identical i5 and i7 indexes and the P5 and P7  
209 Illumina adaptors, along with universal tails complementary to the universal tails used in

210 round 1 PCR (S4 Table, S5 Table) (Ultramers, by IDT, Integrated DNA Technologies). Round 2  
211 PCR was carried out in a final volume of 25  $\mu$ L, including forward and reverse index primers  
212 (0.2  $\mu$ M), 1X Q5 HS High-Fidelity Master Mix (New England Biolabs) and 5  $\mu$ L of purified PCR  
213 product. Thermal cycling conditions were: 98 °C for 3 min; 98 °C for 30 s, 55 °C for 30 s, 72 °C  
214 for 30 s (10 cycles); 72 °C for 5 min, 4 °C for 10 min. Both PCRs were run in triplicate. The  
215 same set of unique indices were added to the triplicates which were then pooled following  
216 visual inspection on an agarose gel (1.5%) to ensure that indices were added successfully.  
217 Pooled metabarcoding libraries were cleaned a second time using Agencourt AMPure  
218 magnetic bead purification, run on an agarose gel (1.5%) and quantified using the Qubit high  
219 sensitivity kit (Thermo Fisher Scientific, Massachusetts, USA). Positive and negative controls  
220 were amplified in triplicate with both primer pairs and sequenced alongside airborne plant  
221 community DNA samples using the MiSeq. Sequence data, including metadata, are available  
222 at the Sequence Read Archive (SRA) using the project accession number SUB4136142.

223

## 224 **Bioinformatic Analysis**

225 Initial sequence processing was carried out following a modified version of the workflow  
226 described by de Vere *et al.* [27]. Briefly, raw sequences were trimmed using Trimmomatic  
227 v0.33 (42) to remove short reads (<200bp), adaptors and low quality regions. Reads were  
228 merged using FLASH v 1.2.11 [27, 31], and merged reads shorter than 450bp were excluded.  
229 Identical reads were merged using fastx-toolkit (v0.0.14), and reads were split into ITS2 and  
230 *rbcL* based on primer sequences.

231

232 To prevent spurious BLAST hits, custom reference databases containing *rbcL* and ITS2  
233 sequences from UK plant species were generated. While all native species of the UK have

234 been DNA barcoded [19], a list of all species found in the UK was generated in order to gain  
235 coverage of non-native species. A list of UK plant species was generated by combining lists of  
236 native and alien species [32] with a list of cultivated plants obtained from Botanic Gardens  
237 Conservation International (BGCI) which represented horticultural species. All available *rbcl*  
238 and ITS2 records were downloaded from NCBI Genbank, and sequences belonging to UK  
239 species were extracted using the script '[creatingselectedfastadatabase.py](#)', archived on  
240 GitHub.

241  
242 Metabarcoding data was searched against the relevant sequence database using blastn [33],  
243 via the script 'blast\_with\_ncbi.py'. The top twenty blast hits were tabulated  
244 ('blast\_summary.py'), then manually filtered to limit results to species currently present in  
245 Great Britain. Reads occurring fewer than four times were excluded from further analysis.  
246 All scripts used are archived on GitHub: <https://doi.org/10.5281/zenodo.1305767>.

247

## 248 **Statistical Analysis**

249 To understand how the grass pollen composition changed with space and time, the effect of  
250 time (measured as the number of days after the first sampling date), latitude and longitude  
251 of sampling location were included in a two-tailed generalized linear model using the  
252 'manyglm' function in the package 'mvabund' [34]. The proportion of sequences was set as  
253 the response variable; proportion data was used as this has been shown to be an effective  
254 way of controlling for differences in read numbers [35]. The effect of time, latitude,  
255 longitude, month (coded as a factor), and the interaction between time and latitude were  
256 included as explanatory variables in the models. In addition to these explanatory variables,

257 the interaction between time and longitude was included in a model to analyse the ITS2 data  
258 (S6 Table).

259

260 The data best fit a negative binomial distribution, most likely due to the large number of  
261 zeros (zeros indicate that a grass genus is absent from a sampling location), resulting in a  
262 strong mean-variance relationship in the data (S6 Fig). The proportion of sequences was  
263 scaled by 1000 and values were converted to integers so that a generalized linear model with  
264 a negative binomial distribution could be used. Model selection was based by Akaike  
265 Information Criterion (AIC) (S6 Table) and visual inspection of the residuals against predicted  
266 values from the models (S7 Fig).

267

268 In order to compare the metabarcoding data with flowering time data, we used phenological  
269 records of first flowering collected in 2016 by citizen scientists from the UK's Nature's  
270 Calendar ([www.naturescalendar.org.uk](http://www.naturescalendar.org.uk)). First flowering time was compared to genus-level  
271 ITS2 metabarcoding data for three species: *Alopecurus pratensis*, *Dactylis glomerata* and  
272 *Holcus lanatus*. As grass pollen could only be reliably identified to genus level in the  
273 metabarcoding data, the taxa compared may not have been exactly equivalent since both  
274 *Alopecurus* and *Holcus* contain other widespread species within the UK. However, *Alopecurus*  
275 *pratensis* and *Holcus lanatus* are the most abundant species within their respective genera.  
276 The comparison was only carried out for ITS2 data because two of the three genera were not  
277 identified by the *rbcl* marker.

278

279 NMDS ordination was carried out using package 'VEGAN' in R [36], based on the proportion  
280 of total high-quality reads contributed by each grass genus, using Bray-Curtis dissimilarity (S2

281 Fig). Ordination is used to reduce multivariate datasets (e.g. abundances of many species)  
282 into fewer variables that reflect overall similarities between samples. A linear model was  
283 carried out using the 'lm' function within the 'stats' package in R, in order to investigate the  
284 relationship between the number of reads obtained for each genus using the rbcL and ITS2  
285 marker.

286

## 287 **References**

- 288 1. Blackley CH. Experimental Researches on the Causes and Nature of Catarrhus Æstivus  
289 (hay-fever Or Hay-asthma)1873 1873. 202 p.
- 290 2. Marks G, Pearce N, Strachan D, Asher I. Global Burden of Disease Due to Asthma. The  
291 Global Asthma Report 2014. Auckland, New Zealand: The Global Asthma Network; 2014. p.  
292 16-21.
- 293 3. Bauchau V. Prevalence and rate of diagnosis of allergic rhinitis in Europe. *Eur Respir J*.  
294 2004;24(5):758-64. doi: 10.1183/09031936.04.00013904.
- 295 4. Bousquet PJ, Chinn S, Janson C, Kogevinas M, Burney P, Jarvis D, et al. Geographical  
296 variation in the prevalence of positive skin tests to environmental aeroallergens in the  
297 European Community Respiratory Health Survey I. *Allergy*. 2007;62(3):301-9. doi:  
298 10.1111/j.1398-9995.2006.01293.x.
- 299 5. García-Mozo H. Poaceae pollen as the leading aeroallergen worldwide: A review.  
300 *Allergy*. 2017;72(12):1849-58. doi: 10.1111/all.13210.
- 301 6. Emberlin J, Jaeger S, Dominguez-Vilches E, Soldevilla CG, Hodal L, Mandrioli P, et al.  
302 Temporal and geographical variations in grass pollen seasons in areas of western Europe: an  
303 analysis of season dates at sites of the European pollen information system. *Aerobiologia*.  
304 2000;16(3-4):373-9.
- 305 7. Emberlin J, Jones S, Bailey J, Caulton E, Corden J, Dubbels S, et al. Variation in the start  
306 of the grass pollen season at selected sites in the United Kingdom 1987–1992. *Grana*.  
307 1994;33(2):94-9.
- 308 8. Mander L, Li M, Mio W, Fowlkes CC, Punyasena SW. Classification of grass pollen  
309 through the quantitative analysis of surface ornamentation and texture. *Proc Biol Sci*.  
310 2013;280(1770):20131905. doi: 10.1098/rspb.2013.1905.
- 311 9. Estrella N, Menzel A, Krämer U, Behrendt H. Integration of flowering dates in  
312 phenology and pollen counts in aerobiology: analysis of their spatial and temporal coherence  
313 in Germany (1992–1999). *Int J Biometeorol*. 2006;51(1):49-59. doi: 10.1007/s00484-006-  
314 0038-7.
- 315 10. Skjøth CA, Sommer J, Stach A, Smith M, Brandt J. The long range transport of birch  
316 (*Betula*) pollen from Poland and Germany causes significant pre-season concentrations in  
317 Denmark. *Clinical & Experimental Allergy*. 2008;37(8):1204-12.
- 318 11. McInnes RN, Hemming D, Burgess P, Lyndsay D, Osborne NJ, Skjøth CA, et al. Mapping  
319 allergenic pollen vegetation in UK to study environmental exposure and human health. *Sci*  
320 *Total Environ*. 2017;599-600:483-99. doi: 10.1016/j.scitotenv.2017.04.136.

- 321 12. van Ree R, van Leeuwen WA, Aalberse RC. How far can we simplify in vitro diagnostics  
322 for grass pollen allergy?: A study with 17 whole pollen extracts and purified natural and  
323 recombinant major allergens. *J Allergy Clin Immunol*. 1998;102(2):184-90.
- 324 13. Moingeon P, Peltre G, Bergmann KC. Rationale for a five-grass pollen vaccine. *Clin Exp*  
325 *Allergy Rev*. 2008;8(1):12-4. doi: 10.1111/j.1472-9733.2008.00124.x.
- 326 14. de Weger LA, Beerthuizen T, Gast-Strookman JM, van der Plas DT, Terreehorst I,  
327 Hiemstra PS, et al. Difference in symptom severity between early and late grass pollen season  
328 in patients with seasonal allergic rhinitis. *Clin Transl Allergy*. 2011;1(1):18. doi: 10.1186/2045-  
329 7022-1-18.
- 330 15. Kraaijeveld K, de Weger LA, García MV, Buermans H, Frank J, Hiemstra PS, et al.  
331 Efficient and sensitive identification and quantification of airborne pollen using next-  
332 generation DNA sequencing. *Mol Ecol Resour*. 2014;15(1):8-16. doi: 10.1111/1755-  
333 0998.12288.
- 334 16. Korpelainen H, Pietiläinen M. Biodiversity of pollen in indoor air samples as revealed  
335 by DNA metabarcoding. *Nord J Bot*. 2017;35(5):602-8. doi: 10.1111/njb.01623.
- 336 17. Deiner K, Bik H, Mächler E, Seymour M, Lacoursière-Roussel A, Altermatt F, et al.  
337 Environmental DNA metabarcoding: Transforming how we survey animal and plant  
338 communities. *Molecular Ecology*. 2017;26(21):5872-95.
- 339 18. Creer S, Deiner K, Frey S, Porazinska D, Taberlet P, Kelley Thomas W, et al. The  
340 ecologist's field guide to sequence-based identification of biodiversity. *Methods in Ecology*  
341 *and Evolution*. 2016;7(9):1008-18.
- 342 19. de Vere N, Rich TCG, Ford CR, Trinder SA, Long C, Moore CW, et al. DNA barcoding the  
343 native flowering plants and conifers of Wales. *PLoS One*. 2012;7(6):e37945. doi:  
344 10.1371/journal.pone.0037945.
- 345 20. England PH. GP in-hours consultations bulletin: 25 August 2016 week 33. Birmingham,  
346 UK: PHE Real-time Syndromic Surveillance Team, 2016.
- 347 21. RGCL. Recommended Grass and Clover Lists. In: Society BG, editor.  
348 [http://www.britishgrassland.com/system/files/uploads/RGCL%20Handbook%202017%206%20](http://www.britishgrassland.com/system/files/uploads/RGCL%20Handbook%202017%206%20WEBpdf)  
349 [WEBpdf](http://www.britishgrassland.com/system/files/uploads/RGCL%20Handbook%202017%206%20WEBpdf). Cheshire, UK: British Grassland Society; 2017.
- 350 22. D'Amato G, Vitale C, Sanduzzi A, Molino A, Vatrella A, D'Amato M. Allergenic Pollen  
351 and Pollen Allergy in Europe. *Allergy*. 2007;62(9):976-90.
- 352 23. Kmenta M, Bastl K, Berger U, Kramer MF, Heath MD, Pätsi S, et al. The grass pollen  
353 season 2015: a proof of concept multi-approach study in three different European cities.  
354 *World Allergy Organ J*. 2017;10(1):31. doi: 10.1186/s40413-017-0163-2.
- 355 24. Chapman D. Greater phenological sensitivity to temperature on higher Scottish  
356 mountains: new insights from remote sensing. *Global Change Biology*. 2013;19:3463-71.
- 357 25. Emecz TI. The effect of meteorological conditions on anthesis in agricultural grasses.  
358 *Annals of Botany*. 1962;26(102):159-72.
- 359 26. Thackeray SJ, Henrys PA, Hemming D, Bell JR, Botham MS, Burthe S, et al.  
360 Phenological sensitivity to climate across taxa and trophic levels. *Nature*.  
361 2016;535(7611):241-5.
- 362 27. Hawkins J, de Vere N, Griffith A, Ford CR, Allainguillaume J, Hegarty MJ, et al. Using  
363 DNA Metabarcoding to Identify the Floral Composition of Honey: A New Tool for Investigating  
364 Honey Bee Foraging Preferences. *PLoS One*. 2015;10(8):e0134735. doi:  
365 10.1371/journal.pone.0134735.
- 366 28. Illumina. 16S Metagenomic Library Preparation. San Diego, California, USA: Illumina,  
367 2013.

- 368 29. Kress WJ, Erickson DL. A two-locus global DNA barcode for land plants: the coding  
369 *rbcl* gene complements the non-coding *trnH-psbA* spacer region. PLoS One. 2007;2(6):e508.  
370 doi: 10.1371/journal.pone.0000508.
- 371 30. Miya M, Sato Y, Fukunaga T, Sado T, Poulsen JY, Sato K, et al. MiFish, a set of universal  
372 PCR primers for metabarcoding environmental DNA from fishes: detection of more than 230  
373 subtropical marine species. Royal Society open science. 2015;2(7):150088.
- 374 31. Magoc T, Salzberg SL. FLASH: fast length adjustment of short reads to improve  
375 genome assemblies. Bioinformatics. 2011;27(21):2957-63. doi:  
376 10.1093/bioinformatics/btr507.
- 377 32. Stace C. New flora of the British Isles. Cambridge, UK: Cambridge University Press;  
378 2010.
- 379 33. Camacho C, Coulouris G, Avagyan V, Ma N, Papadopoulos J, Bealer K, et al. BLAST+:  
380 architecture and applications. BMC Bioinformatics. 2008;10:421.
- 381 34. Wang YI, Naumann U, Wright ST, Warton DI. mvabund—an R package for model-based  
382 analysis of multivariate abundance data. Methods in Ecology and Evolution. 2012;3(3):471-4.
- 383 35. McMurdie PJ, Holmes S. Waste not, want not: why rarefying microbiome data is  
384 inadmissible. PLoS Computational Biology. 2014;10(4):e1003531.
- 385 36. Dixon P. VEGAN, a package of R functions for community ecology. Journal of  
386 Vegetation Science. 2003;14(6):927-30.
- 387 37. Cope C, Gray A. Grasses of the British Isles. 13 ed. London, UK: Botanical Society of  
388 the British Isles; 2009.

389

## 390 List of Supplementary Materials

391 Supplementary text

392 References

393 S1 – S7 Figs

394 S1 List

395 S1 – S6 Tables

396

## 397 Acknowledgements

398 We thank John Kenny, Pia Koldkjær, Richard Gregory, and Anita Lucaci of the Liverpool

399 Centre for Genomic Research for sequencing support. We acknowledge the computational

400 services & support of the Supercomputing Wales project, which is part-funded by the

401 European Regional Development Fund (ERDF) via Welsh Government. We thank the Botanic

402 Gardens Conservation International (BGCI) for access to the list of plant collections in the

403 National Gardens in the UK and Ireland. We thank the Met Office network for providing



404 additional observational grass pollen count data and Jonathan Winn, UK Met Office for  
405 ArcGIS assistance on S1 Fig. We are grateful to the Woodland Trust and Centre for Ecology &  
406 Hydrology for supplying the UK Phenology Network data and to the citizen scientists who  
407 have contributed to the latter scheme. Final thanks to Wendy Grail and technical support  
408 staff at Bangor University.

409

410 **Author Contributions:** S.C., N.dV., G.W.G., R.N.M., N.J.O., C.A.S., Y.C. and G.L.B. conceived and  
411 designed the study; B.A-G., G.L.B., G.P., A.E., R.N., S.P., K.S., and N.S. collected samples and  
412 counted pollen; G.L.B. performed laboratory work, supported by S.C.; N.dV., C.R.F., L.J. and  
413 S.C. contributed methods; C.P. and G.L.B. analysed the data and G.L.B., C.P. and S.C.  
414 produced the first draft of the manuscript. All authors contributed substantially to the final  
415 submitted manuscript.

416

417 **Funding:** This work was supported by the Natural Environment Research Council  
418 (<https://nerc.ukri.org/>), awarded to SC (NE/N003756/1), CS (NE/N002431/1), NO  
419 (NE/N002105/1) and NdV and GG (NE/N001710/1). The funders had no role in study design,  
420 data collection and analysis, decision to publish, or preparation of the manuscript.

421

422 **Competing interests:** The authors are not aware of any competing interests.

423

424 **Data and materials availability:** All sequence data (including metadata) are available at the  
425 Sequence Read Archive (SRA) using the project accession number SUB4136142. Archived  
426 sequence data was used to generate Fig 1 to 3 (including S2-S4 and S6-S7 Figs). First  
427 flowering data used in Fig 3 was obtained from Nature's Calendar, Woodland Trust and is

428 available upon request. The sequence analysis pipeline is available at

429 <https://github.com/colford/nbgw-plant-illumina-pipeline>.

430

## 431 Figure Legends

432

433 **Fig 1. Abundance of the most common airborne grass pollen taxa throughout the grass allergy**

434 **season.** The five most abundant grasses (expressed as proportion of total reads), depicted

435 alongside the total proportion of reads assigned to family Poaceae. Markers used to identify

436 grass pollen are stated in the top panel label. Due to errors in sampling equipment, only 4

437 weeks of samples were collected at the York sampling site. Sampling sites are indicated in the

438 right panel label abbreviated as follows: BNG = Bangor; EXE = Exeter; ING = Invergowrie; IOW

439 = Isle of Wight; WOR = Worcester; YORK = York. A map of sampling locations can be found in

440 S1 Fig.

441

442 **Fig 2. Abundance of airborne grass pollen taxa throughout the grass allergy season.**

443 Abundance of rare grasses (expressed as proportion of total reads). Sampling sites are

444 indicated in the top panel, followed by the marker used to identify grass pollen. Due to errors

445 in sampling equipment, only 4 weeks of samples were collected at the York sampling site.

446 Note that the y axes differ between panels. Refer to Fig 1 for site name abbreviations.

447

448 **Fig 3. Airborne grass pollen observed 3-4 weeks after first flowering dates.** Comparison of

449 genus incidence in metabarcoding data with records of first flowering dates in 2016 from the

450 citizen science project Nature's Calendar ([www.naturescalendar.org.uk](http://www.naturescalendar.org.uk)) for (A) *Alopecurus*

451 *pratensis*, (B) *Dactylis glomerata* and (C) *Holcus lanatus*. Each grey point represents the

452 earliest time of flower heading as observed by a participant in the project. Coloured points  
453 represent metabarcoding samples, with the size of the point representing the proportion of  
454 total reads assigned to the relevant genus. Yellow shaded areas represent the expected  
455 flowering period as described in [37], with darker shades showing the 'main' flowering  
456 period.  
457

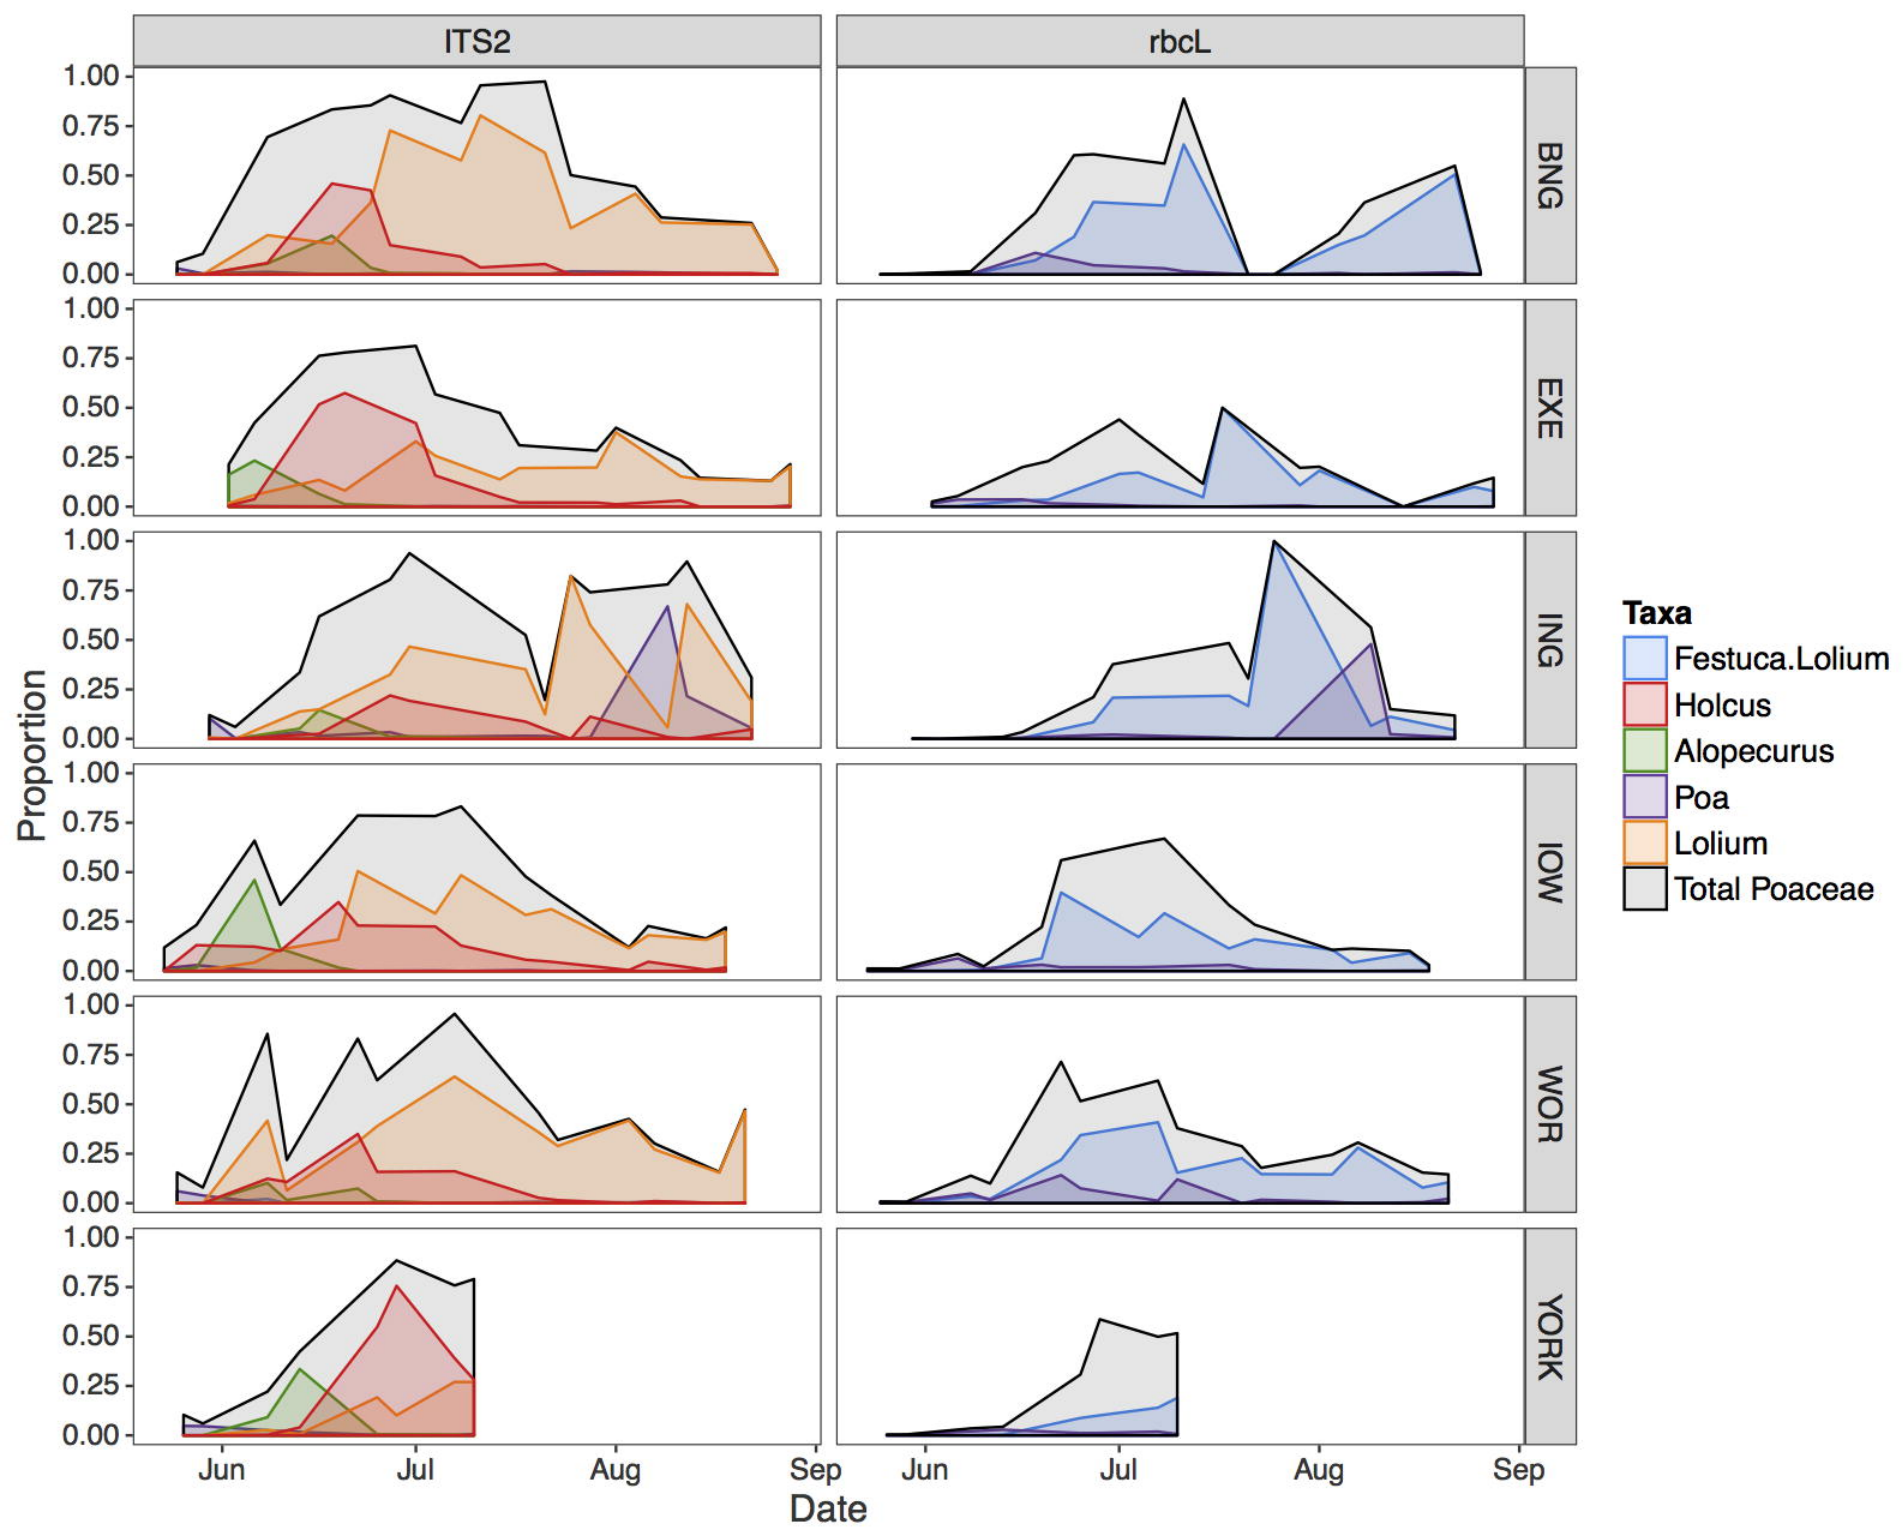

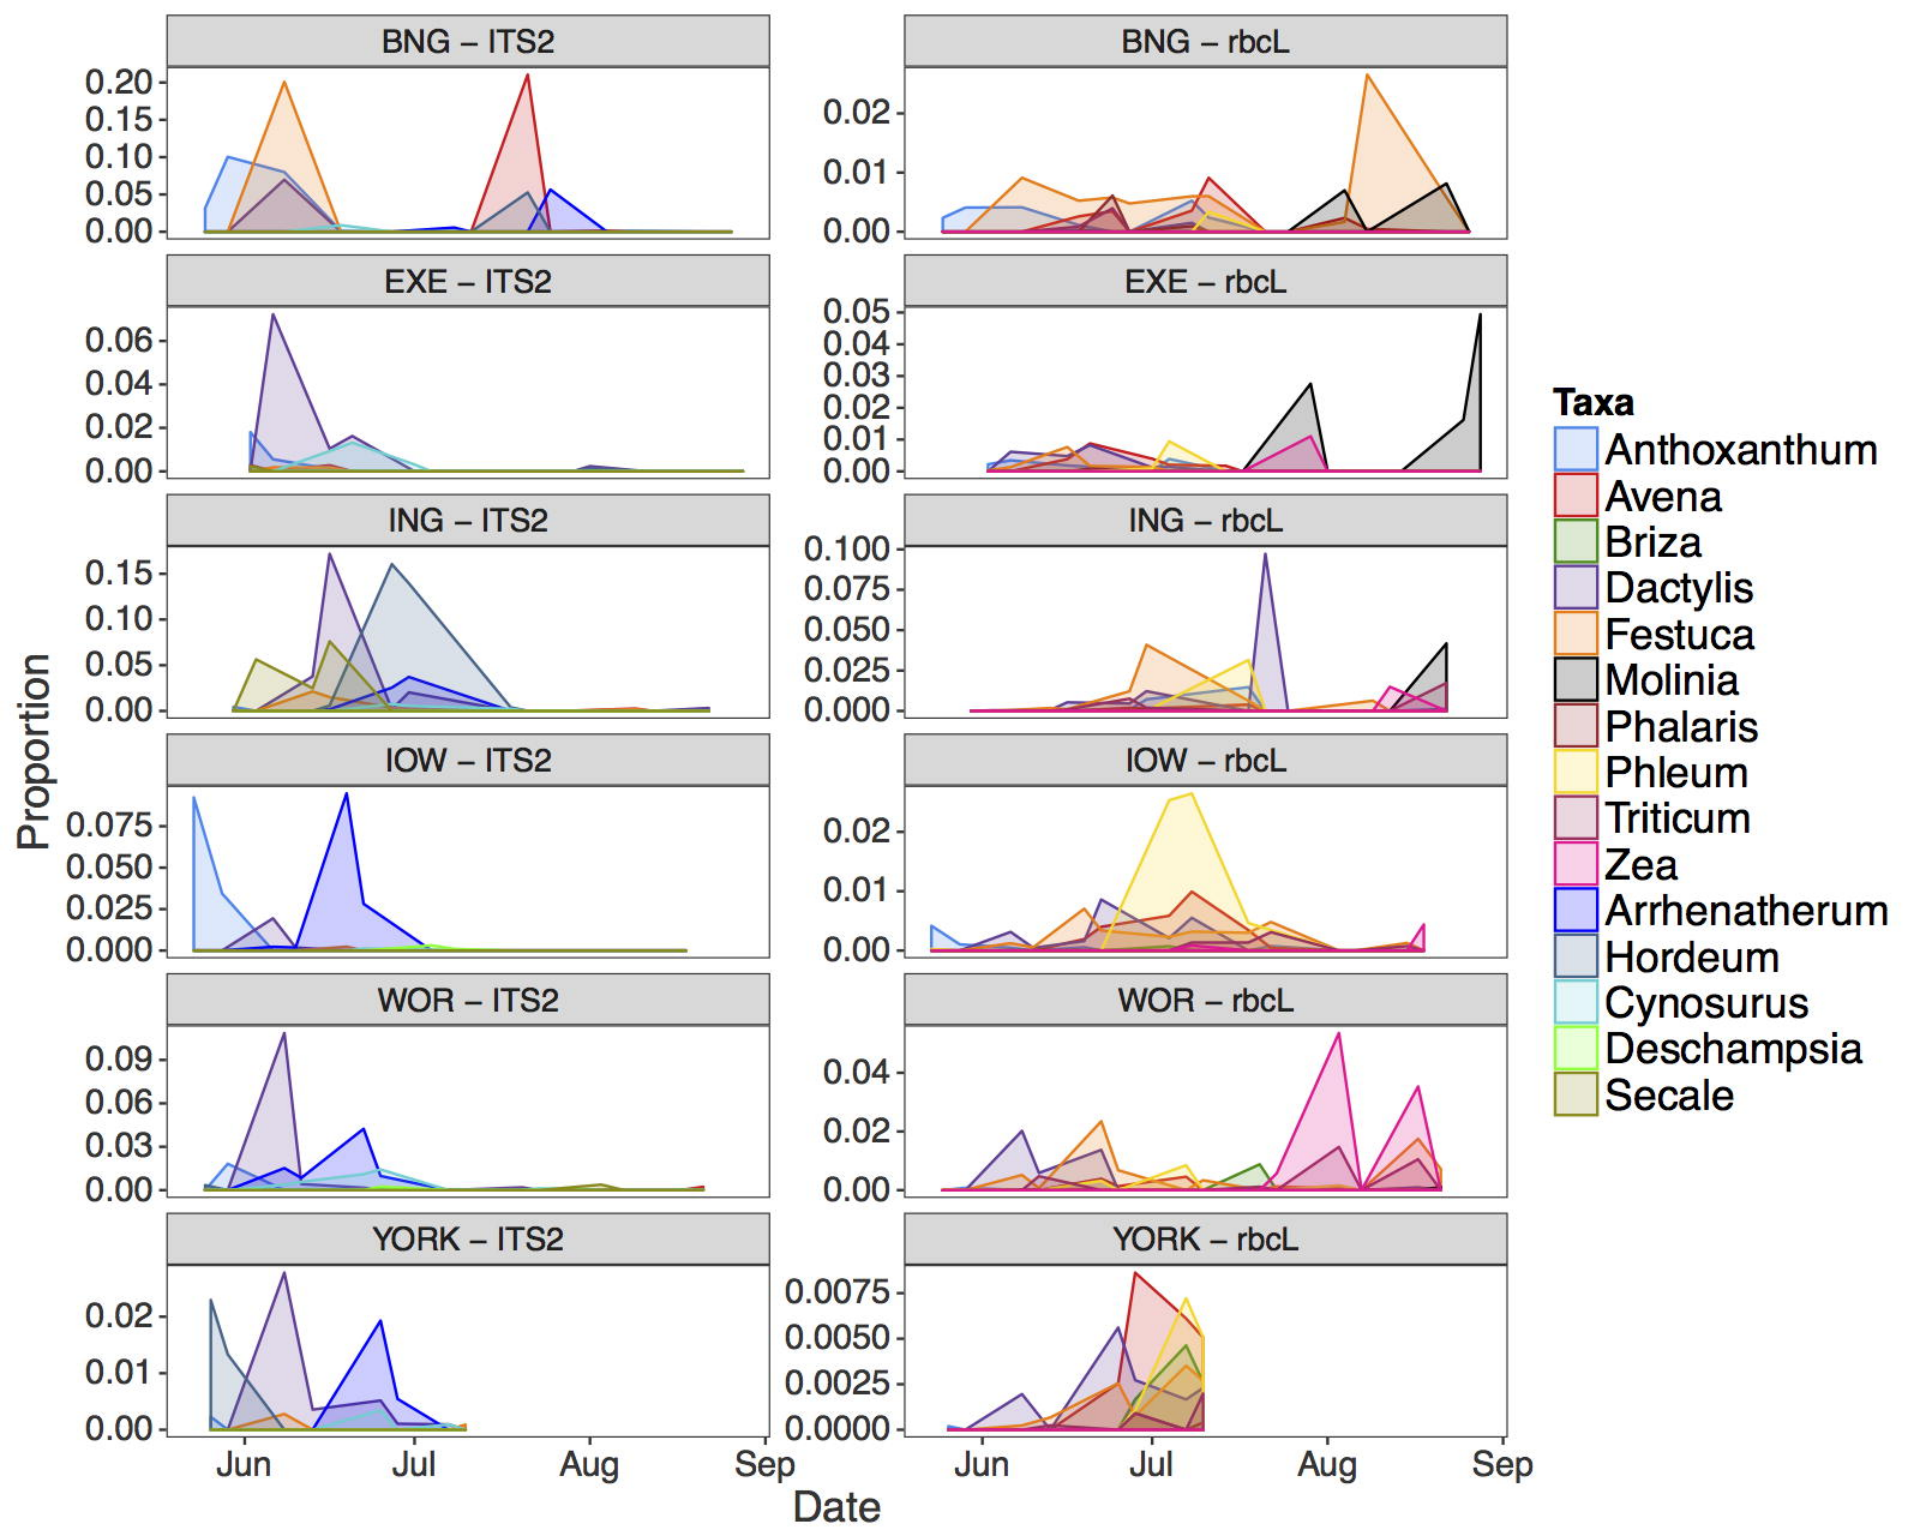

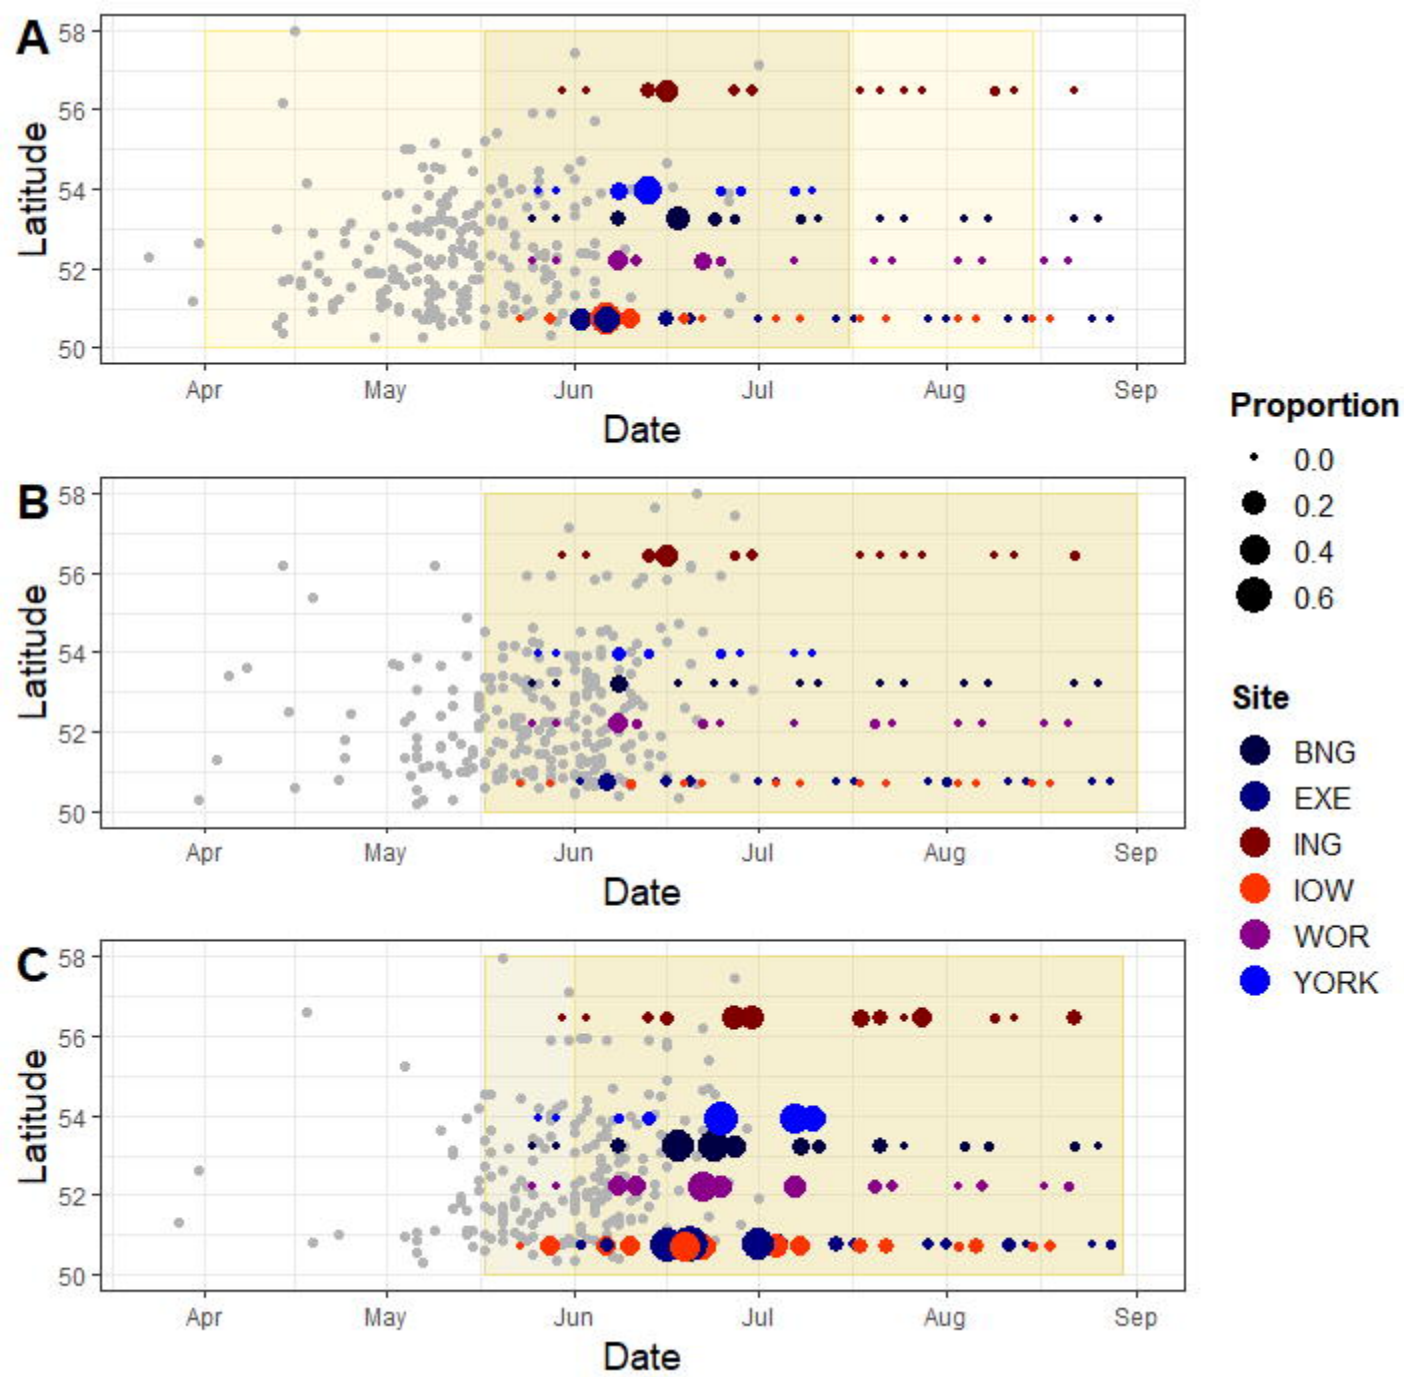

Source: https://www.biorxiv.org/content/10.1101/410829v1.full.pdf
